# Supplementary material for: Nitrogen-doped Fe3C@C particles as an efficient heterogeneous photo-assisted Fenton catalyst
Source: Royal Society of Chemistry journal article supplement (doi:10.1039/c7ra00486a), 2017-01-01
Supplement: c7ra00486a1.pdf [file c7ra00486a1.pdf]

Supporting Information

**Nitrogen-doped Fe<sub>3</sub>C@C particles as efficient  
heterogeneous photo-assisted Fenton catalyst**

*Xiaoling Yang,<sup>‡a</sup> Chengjia Li,<sup>‡a</sup> Jianfei Huang,<sup>b</sup> Yanyan Liu,<sup>a</sup> Wei Chen,<sup>a</sup> Jianhua Shen,<sup>a</sup> Yihua Zhu,<sup>\*a</sup> and Chunzhong Li<sup>\*a</sup>*

<sup>a</sup> Key Laboratory for Ultrafine Materials of Ministry of Education, School of Materials Science and Engineering, East China University of Science and Technology, Shanghai 200237, China. E-mail: yhzhu@ecust.edu.cn, czli@ecust.edu.cn

<sup>b</sup> Department of Chemistry and Biochemistry, University of California, Santa Barbara, Santa Barbara 93106, CA, USA

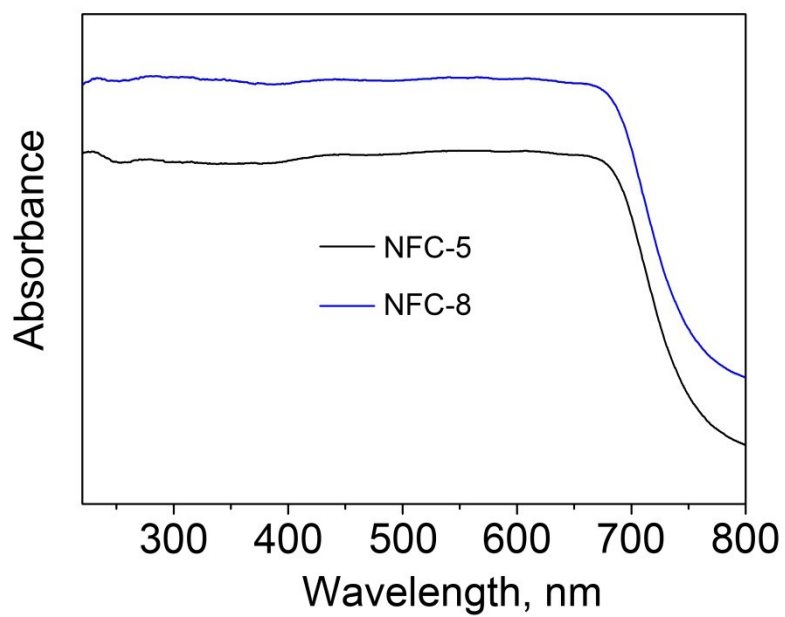

**Fig. S1.** UV-visible spectra of NFC-5 and NFC-8.

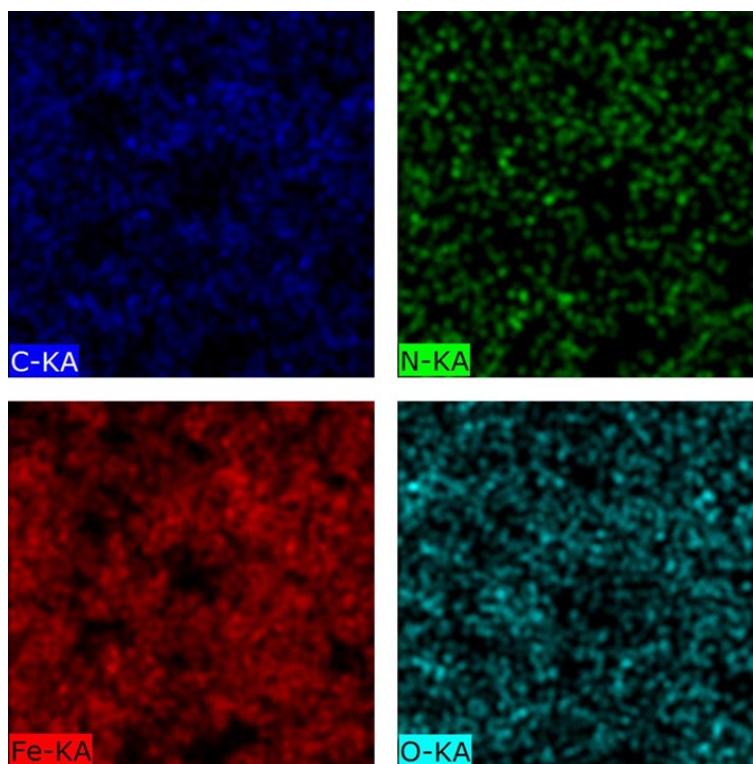

**Fig. S2.** Element mapping of NFC-8 particles.

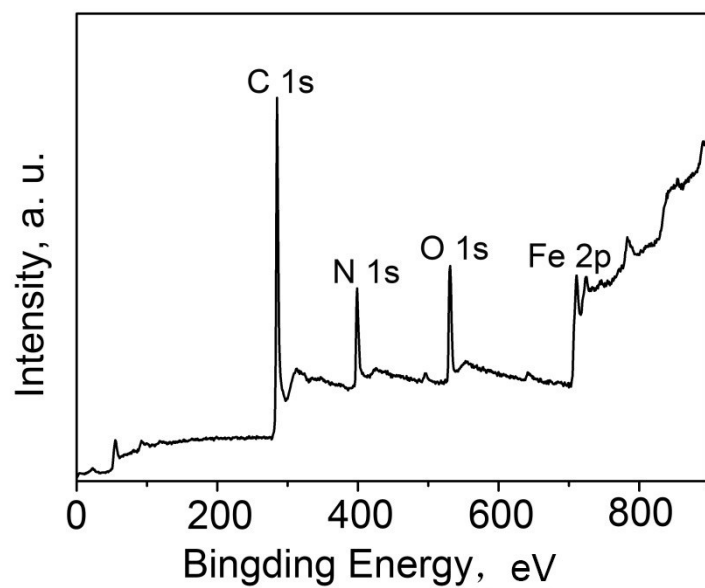

**Fig. S3.** The XPS survey scan of the NFC-8.

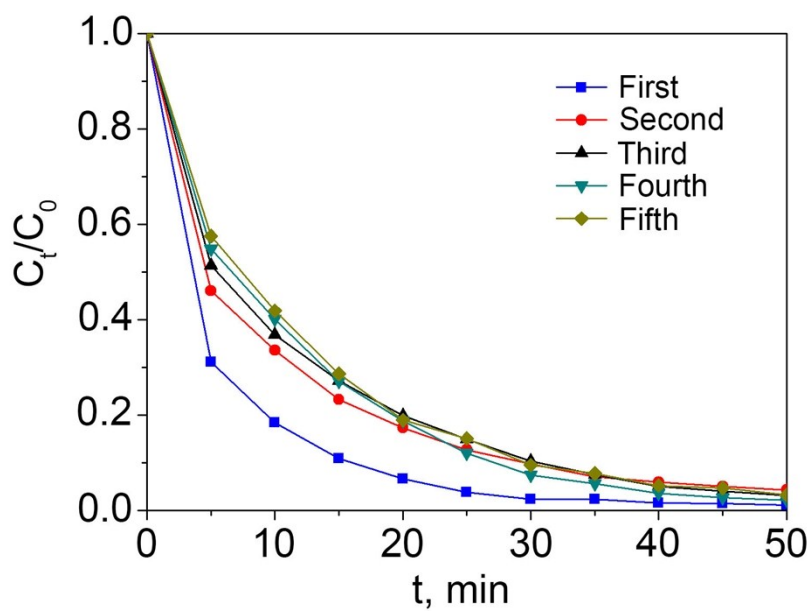

**Fig. S4.** Recycling performance of NFC-8.

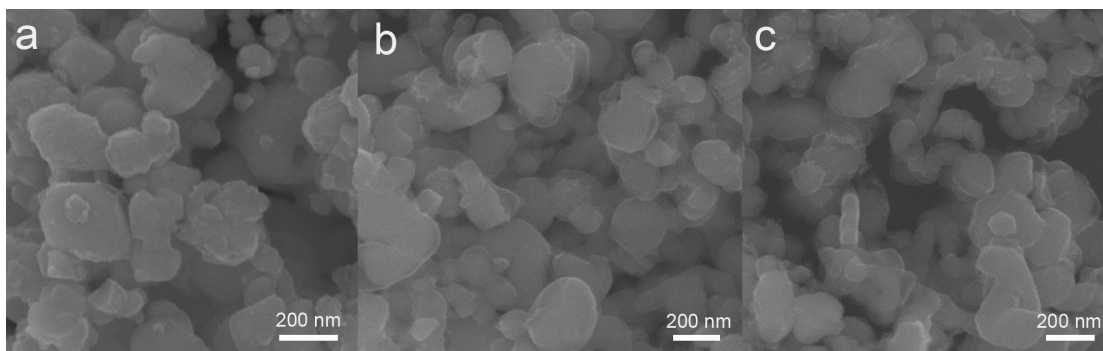

**Fig. S5.** SEM images of (a) NFC-2, (b) NFC-5, (d) NFC-12.

There are no obvious difference in morphology and structure among various NFC samples as showed in Fig. 2c and Fig. S5.

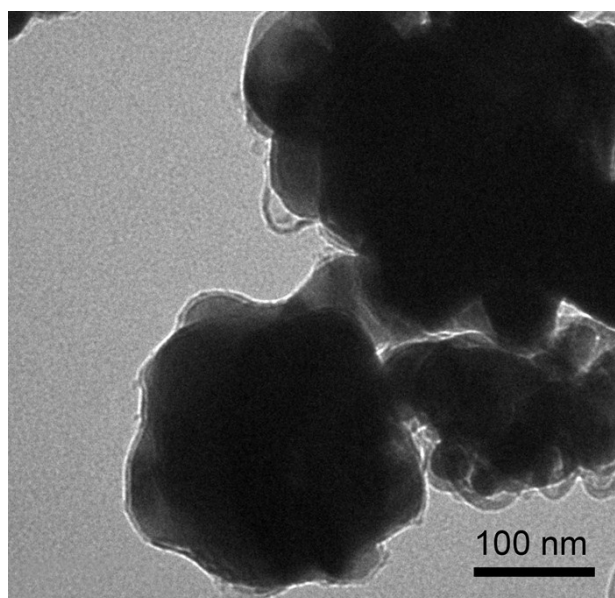

**Fig. S6.** SEM and TEM images of NFC-8 after recycling performance testing.

There are no obvious changes in morphology and structure after recycling performance testing.

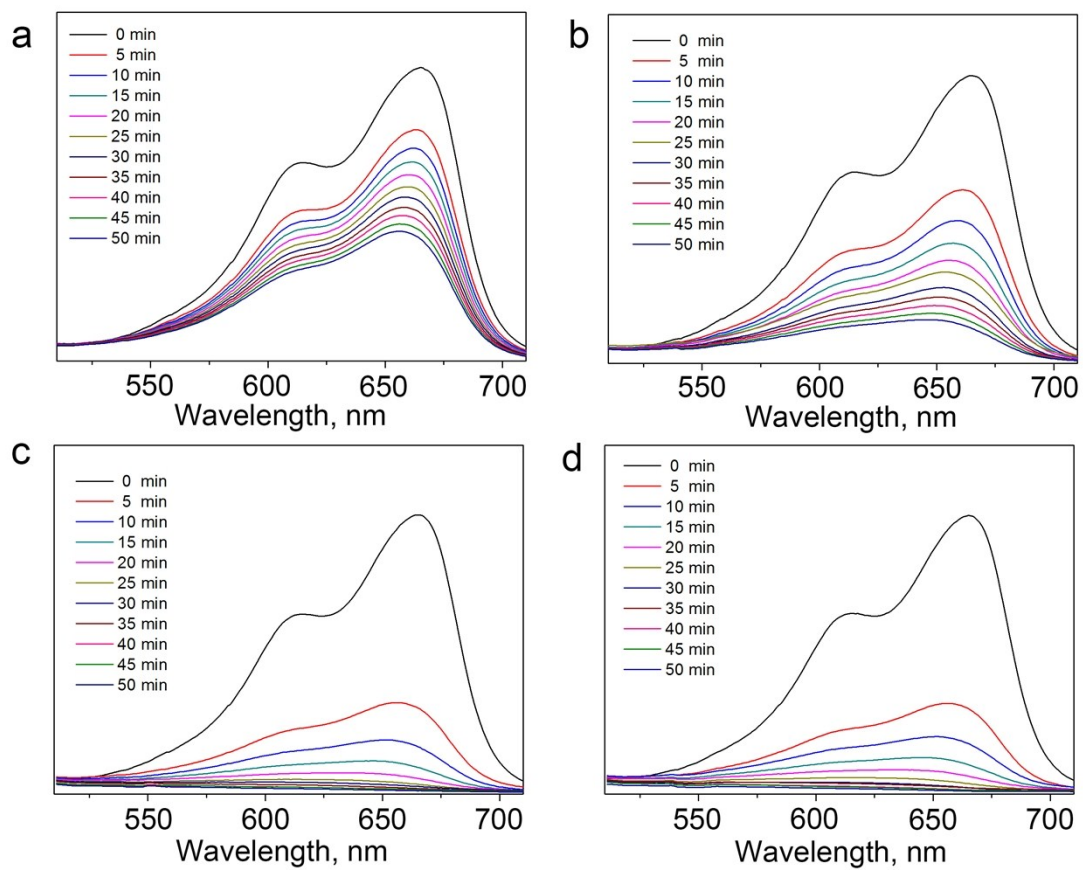

**Fig. S7.** UV-Vis adsorption changes of methylene blue solutions during photo-assisted Fenton process. 0.15 M  $\text{H}_2\text{O}_2$  with NFC-8 (a) 0.25 g/L, (b) 0.5 g/L, (c) 0.75 g/L, (d) 1.0 g/L.

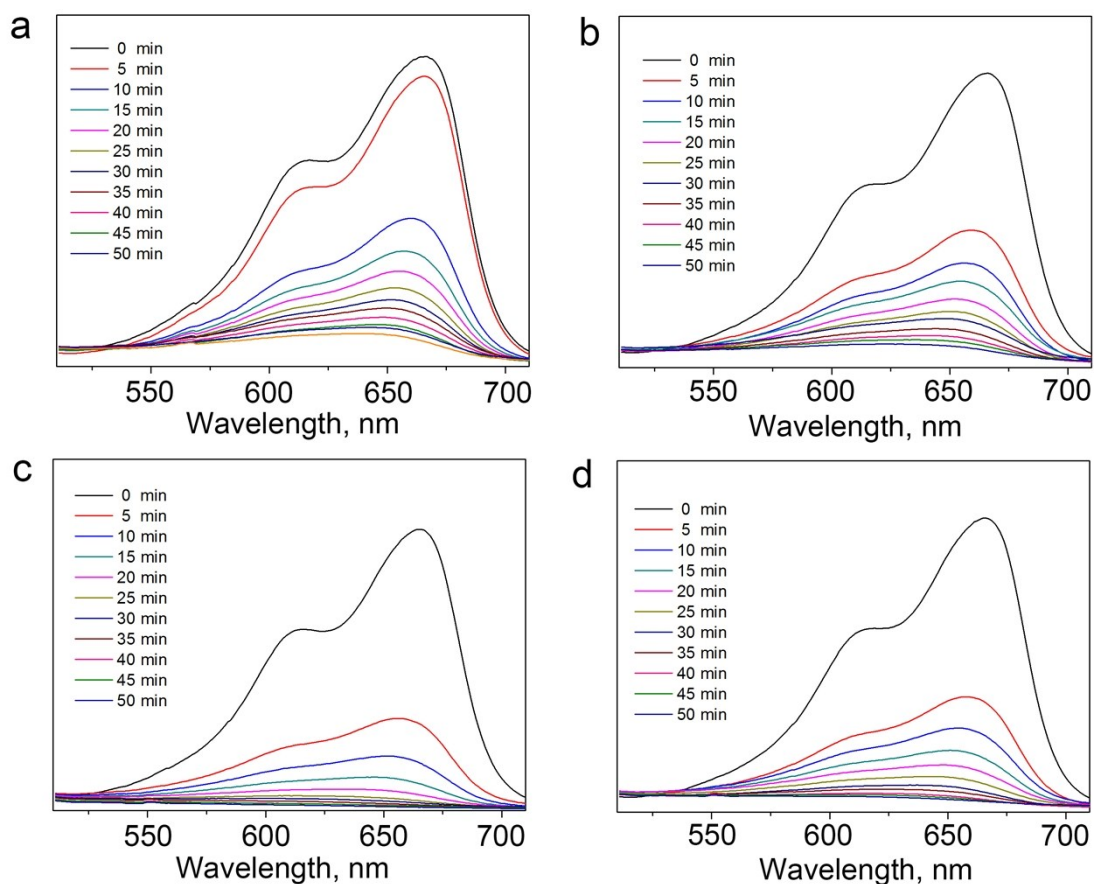

**Fig. S8.** UV-Vis adsorption changes of methylene blue solutions during photo-assisted Fenton process. 0.75 g/L NFC-8 with  $\text{H}_2\text{O}_2$  (a) 0.1 M, (b) 0.125 M, (c) 0.15 M, (d) 1.0 M.

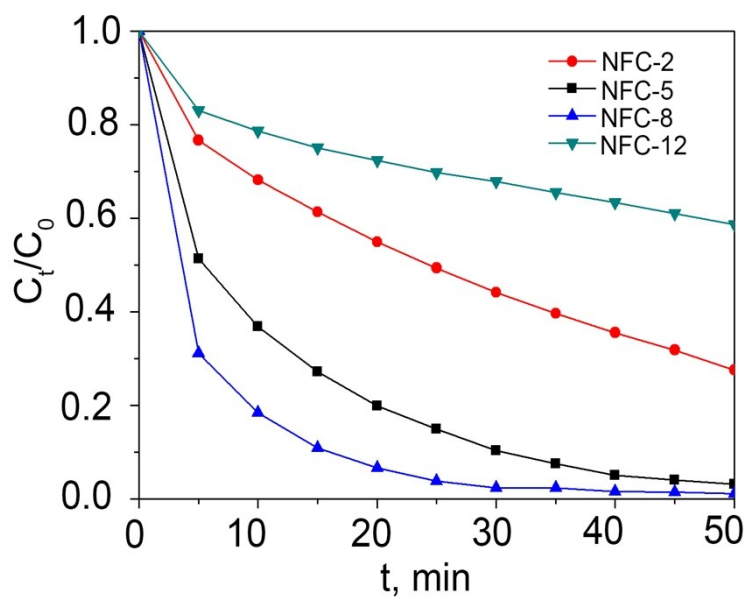

**Fig. S9.** The MB degradation efficiency of NFC-2, NFC-5, NFC-8 and NFC-12.
